# Supplementary material for: Spatial, Temporal, and Dietary Variables Associated with Elevated Mercury Exposure in Peruvian Riverine Communities Upstream and Downstream of Artisanal and Small-Scale Gold Mining
Source: Int J Environ Res Public Health. 2017 Dec 15;14(12):1582. doi: 10.3390/ijerph14121582 (PMC5751000; doi:10.3390/ijerph14121582)
Supplement: Supplementary file 1 [file ijerph-14-01582-s001.pdf]

## Supplementary Materials

### Oral reference dose calculation

The proportion of individuals with an oral reference dose that exceeded the USEPA reference dose of 0.1 µg/kg/day was calculated using the weight of an individual (kg), household fish consumption by trophic level, average mercury content in fish tissue, and an assumed portion size of 110 g [1,2]. Household fish consumption was estimated from survey responses based on fish type and trophic level (Table S1). The sum yearly consumption for fish by trophic level was calculated based on survey responses that included daily (365 d), weekly (52 d), seasonally or sometimes (13 d), and never (0 d). This yearly total was divided by 365 to calculate daily intake (times/d). The mean mercury content of fish (mg/kg) by trophic level was calculated from fish near (100 km upstream and downstream) each community or area of the river. The following equation was utilized to calculate an individual's oral reference dose (mg/kg/day):

$$\begin{aligned} &[(\text{mean fish Hg content}_{(\text{trophic level 1})} \times \text{portion size} \times \text{daily intake}_{(\text{trophic level 1})} \div \text{weight}) + \\ &[(\text{mean fish Hg content}_{(\text{trophic level 2})} \times \text{portion size} \times \text{daily intake}_{(\text{trophic level 2})} \div \text{weight}) + \\ &[(\text{mean fish Hg content}_{(\text{trophic level 3})} \times \text{portion size} \times \text{daily intake}_{(\text{trophic level 3})} \div \text{weight})]. \end{aligned}$$

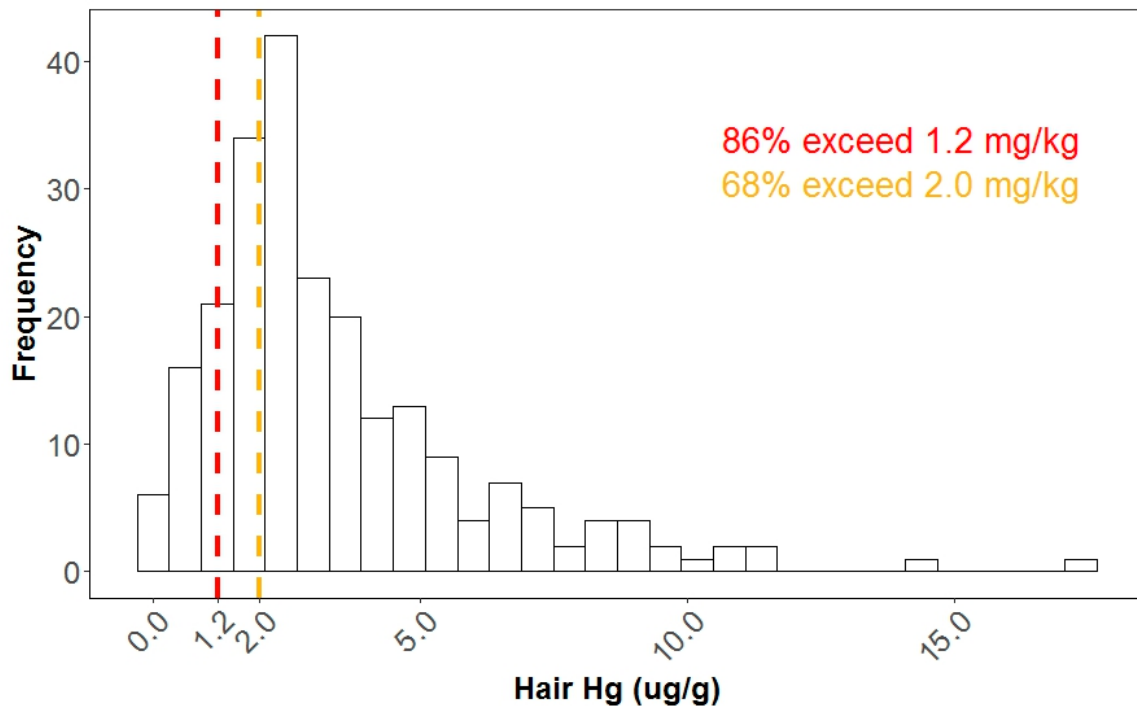

**Figure S1.** Distribution of hair mercury in the study population ( $n = 231$ ). 84% of individuals had hair mercury contents above the USEPA limit (1.2 µg/g, dashed red line) and 65% had levels above the WHO limit (2.0 µg/g, dashed yellow line). Skewness values by community: SAL 0.30, ITA 0.30, BMA 1.27, SJG 1.35, BOA 2.21, BOI 0.70, TRE 0.97, PPA 0.60, BMD 0.85, PAL 0.15, VAL 1.05, and PAR 1.36. Kurtosis values by community: SAL 1.90, ITA 2.02, BMA 4.51, SJG 5.00, BOA 7.74, BOI 2.91, TRE 3.01, PPA 2.61, BMD 2.69, PAL 3.02, VAL 1.05, and PAR 3.78.

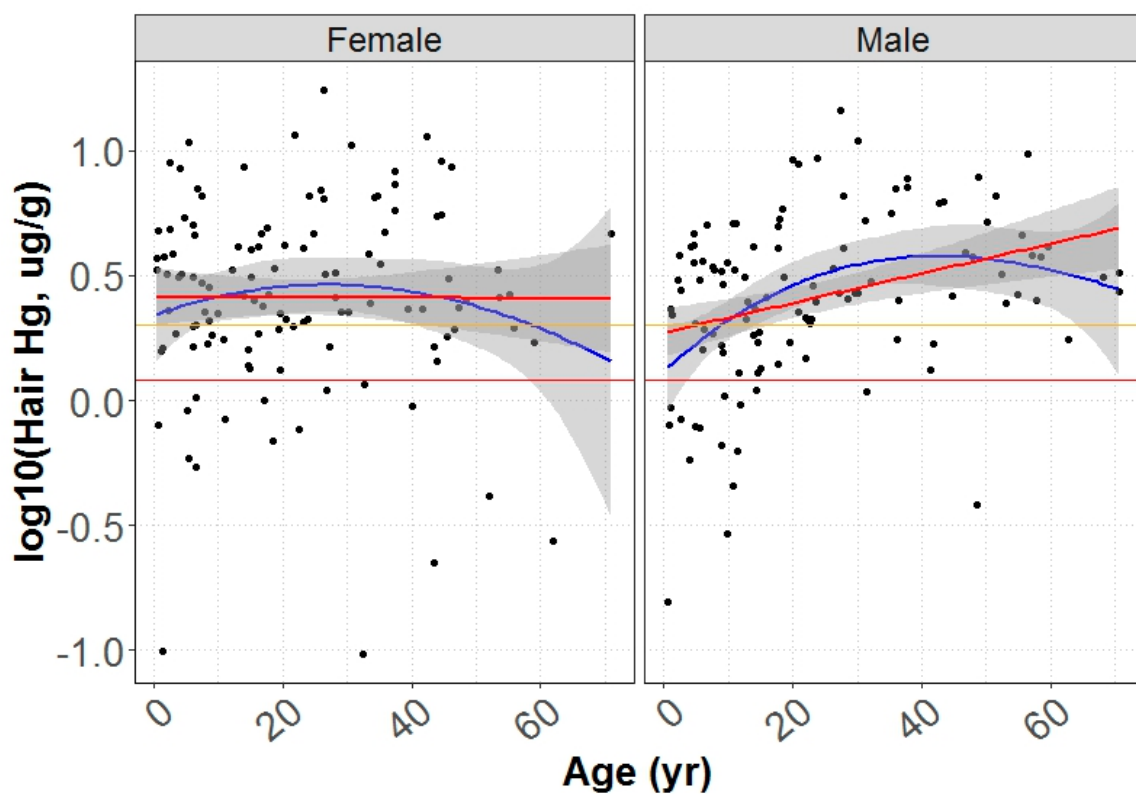

**Figure S2.** The relationship between hair mercury content and age varies by sex. This relationship is represented with a linear relationship (red line with the 95% confidence interval indicated in grey) and one with cubic splines (blue line with the 95% confidence interval indicated in grey). Horizontally, the USEPA limit (1.2  $\mu\text{g/g}$ , red line) and WHO limit (2.0  $\mu\text{g/g}$ , yellow line) are indicated.

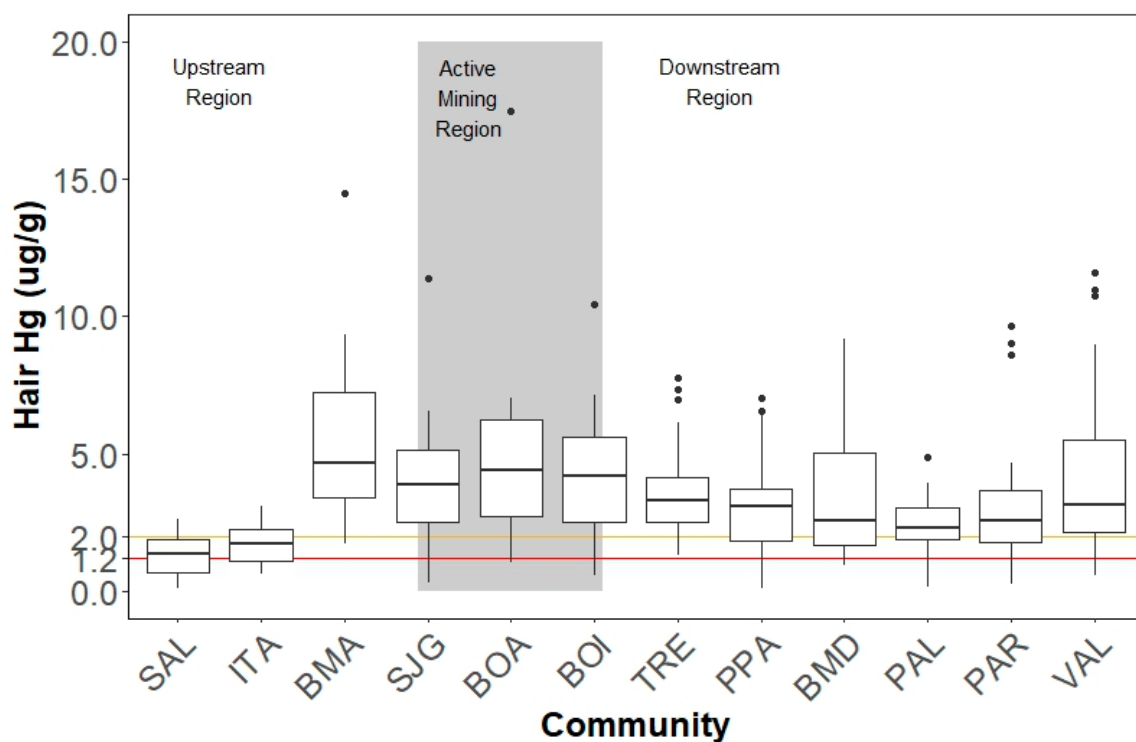

**Figure S3.** Hair mercury contents varied by community with many individuals having levels above the USEPA limit (1.2  $\mu\text{g/g}$ , red line) and WHO limit (2.0  $\mu\text{g/g}$ , yellow line). The grey region indicates communities where intensive active mining is present.

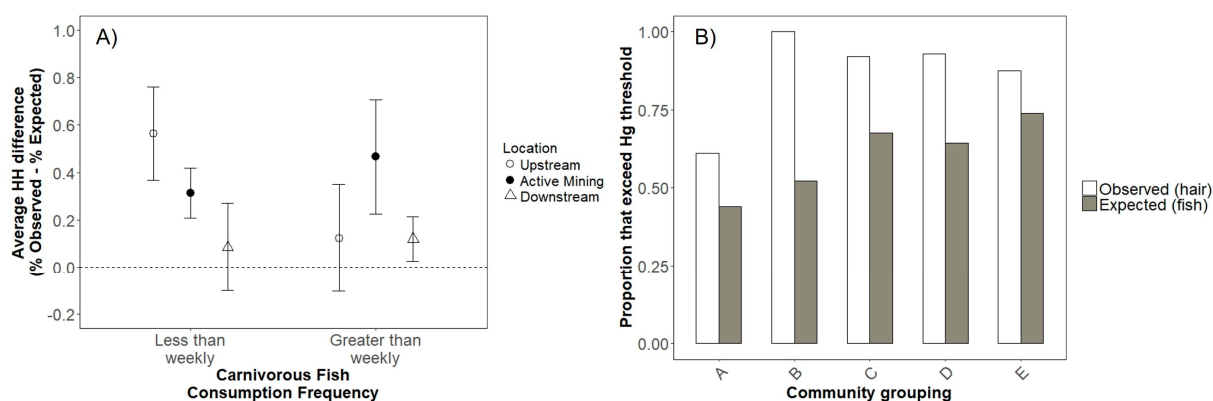

**Figure S4.** (Panel A) Average percent difference ( $\pm$ SE) of HH members that were observed to exceed the USEPA limit ( $1.2 \mu\text{g/g}$ ) compared to the expected proportion that would exceed the limit based on the proportion of fish caught near ( $\pm 50 \text{ km}$ ) the community that exceeded the USEPA limit for water quality ( $0.3 \text{ mg/kg}$ ). HHs are grouped by location relative to mining (upstream, near active mining, and downstream) and by carnivorous fish consumption (less than weekly, weekly or greater consumption). (Panel B) The proportion of observed individuals from community groupings that had hair mercury content that exceeded the USEPA limit compared to the expected proportion that would exceed the limit based on the proportion of fish caught near ( $\pm 50 \text{ km}$ ) the community that exceeded the USEPA limit for water quality. Community groupings are as follows: A: communities upstream of mining with low hair mercury (SAL, ITA), B: communities upstream and high hair mercury (BMA), C: communities near mining inputs (SJG, BOA, BOI), D: communities downstream that are downstream of mining (TRE, PPA), and E: communities further downstream (BMD, PAL, PAR, VAL).

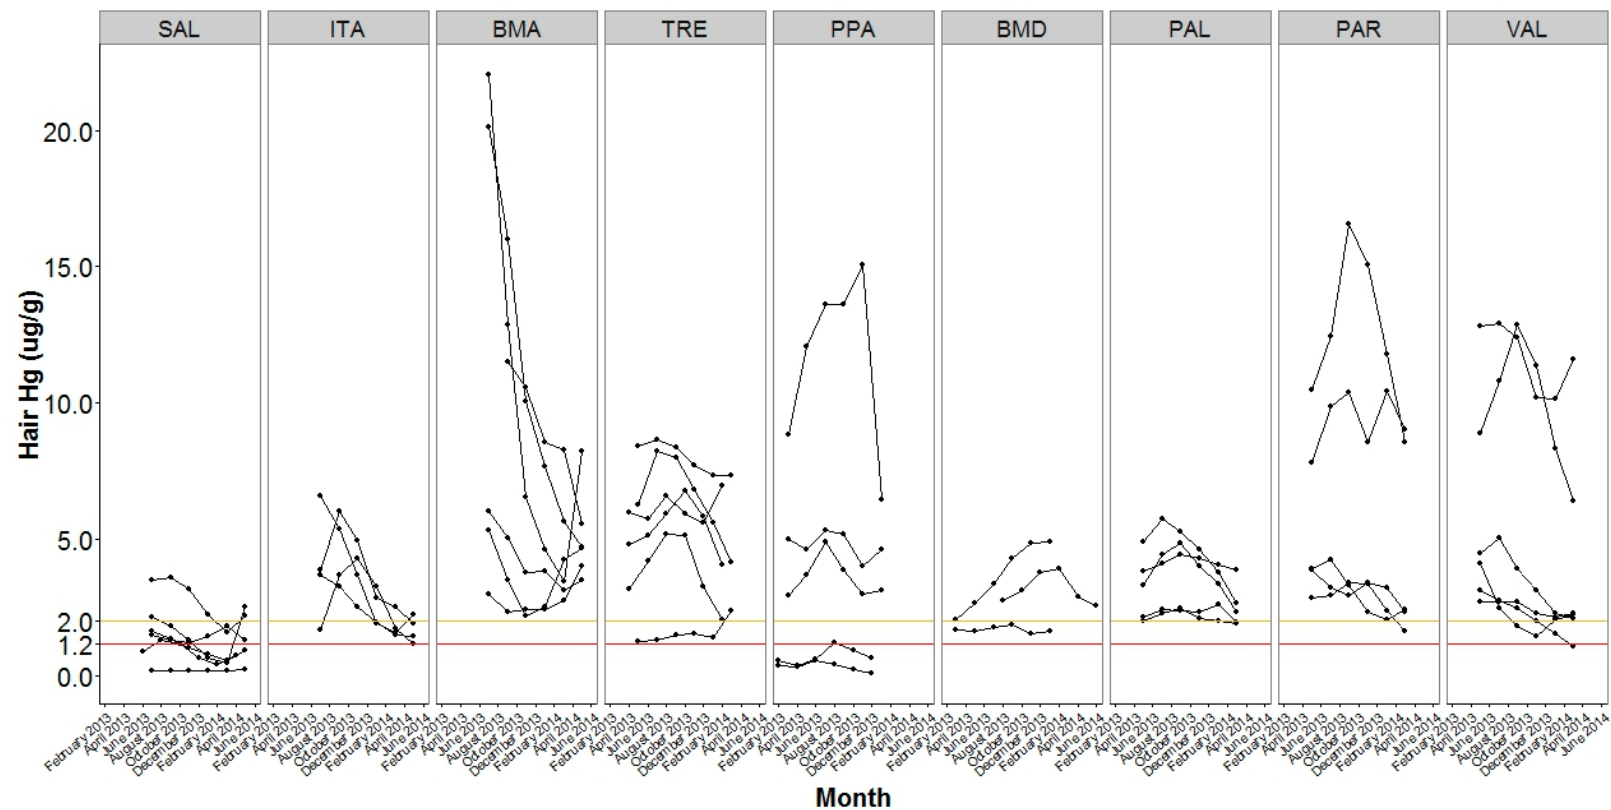

**Figure S5.** Temporal exposure over a year timeframe was measured in WCBA (n=46). Differences by community are depicted with lines connecting hair mercury contents (ppm) of each individual woman over 2-cm (approximately 2 month) intervals. The red line representing the USEPA limit (1.2  $\mu\text{g/g}$ , dashed red line) and WHO limit (2.0  $\mu\text{g/g}$ , dashed yellow line).

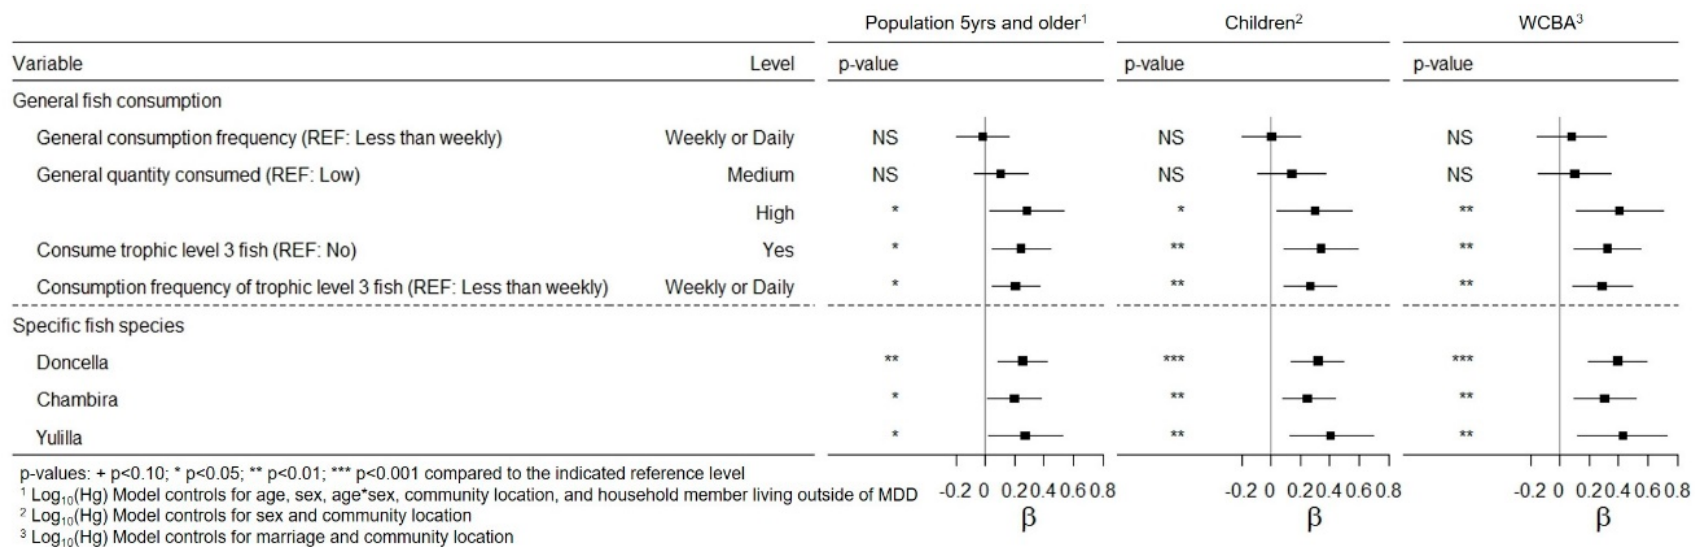

**Figure S6.** Association between hair mercury and dietary fish consumption in the population five yrs and older, children, and WCBA.

**Table S1.** Trophic levels of fish.

|              | <b>Species Name</b>                                                                                                   | <b>Trophic level</b> |
|--------------|-----------------------------------------------------------------------------------------------------------------------|----------------------|
| Ashara       | <i>Leiarius marmoratus</i>                                                                                            | 3                    |
| Bagre        | <i>Megalonema platycephalum</i> , <i>Pimelodus sp.</i>                                                                | 3                    |
| Bocachico    | <i>Prochilodus nigricans</i>                                                                                          | 1                    |
| Carachama    | <i>Liposarcus sp.</i> , <i>Pterigoplectis disjunctivus</i> ,<br><i>Hypostomus sp.</i> , <i>Squaliforma phrixosoma</i> | 1                    |
| Chambira     | <i>Hydrolycus pectoralis</i> , <i>Raphiodon vulpinus</i>                                                              | 3                    |
| Doncella     | <i>Pseudoplatystoma punctifer</i>                                                                                     | 3                    |
| Dorado       | <i>Brachyplatystoma rousseauxii</i>                                                                                   | 3                    |
| Gamitana     |                                                                                                                       | 2                    |
| Huasaco      | <i>Hoplias malabaricus</i>                                                                                            | 3                    |
| Jurel        |                                                                                                                       | 3                    |
| Mojasitas    |                                                                                                                       | 1                    |
| Mota         |                                                                                                                       | 3                    |
| Paco         |                                                                                                                       | 2                    |
| Palometa     | <i>Mylossoma aureum</i> , <i>Mylossoma duriventre</i>                                                                 | 2                    |
| Pana         |                                                                                                                       | 3                    |
| Peje perro   |                                                                                                                       | 3                    |
| Piro         | <i>Megalodoras irwini</i>                                                                                             | 2                    |
| Sabalo       | <i>Salminus affinus</i>                                                                                               | 3                    |
| Yahuarachi   | <i>Potamorhina altamazonica</i> , <i>Potamorhina latior</i>                                                           | 1                    |
| Yulilla      | <i>Anodus elongatus</i>                                                                                               | 1                    |
| Zungaro Mota |                                                                                                                       | 3                    |
| Zungaro      | <i>Zungaro zungaro</i>                                                                                                | 3                    |

**Table S2.** FAO food categories for non-fish items.

| <b>Food Category</b>   | <b>Food Item</b>         |
|------------------------|--------------------------|
| Cereal                 | Corn                     |
|                        | Kiwicha                  |
|                        | Noodles                  |
|                        | Quinoa                   |
|                        | Rice                     |
| White Roots and Tubers | Potatoes                 |
|                        | Yuca                     |
|                        | Asparagus                |
| Vegetables             | Beets                    |
|                        | Broccoli                 |
|                        | Corn                     |
|                        | Lettuce                  |
|                        | Onion                    |
|                        | Tomato                   |
|                        | Mango                    |
| Vitamin A Rich Fruits  | Maracuya (passion fruit) |
|                        | Papaya                   |

---

|                               |                                                                                         |
|-------------------------------|-----------------------------------------------------------------------------------------|
| Other Fruits                  | Aguaje<br>Banana<br>Camu camu<br>Chirimoya<br>Cocona<br>Guanabana<br>Orange<br>Tomato   |
| Organ Meat                    | Liver                                                                                   |
| Flesh Meat                    | Monkey<br>Chicken<br>Deer<br>Grubs<br>Guinea pig<br>Meat<br>Peccary<br>Pork<br>Reptiles |
| Eggs                          | Eggs                                                                                    |
| Legumes, Nuts, Seeds          | Brazil nut*<br>Peanut<br>Sacha Inchi seed                                               |
| Milk                          | Cheese                                                                                  |
| Sweets                        | Yogurt<br>Chips<br>Sweets                                                               |
| Spices, Condiments, Beverages | Aji<br>Coffee<br>Soda                                                                   |

---



|                                            |                             |        |                  |       |        |                 |       |        |                  |         |
|--------------------------------------------|-----------------------------|--------|------------------|-------|--------|-----------------|-------|--------|------------------|---------|
| BMI (REF: normal)                          | Underweight                 | -0.179 | (-0.341, -0.019) | 0.029 | -      | -               | -     | -      | -                | -       |
|                                            | Overweight                  | -0.020 | (-0.114, 0.076)  | 0.668 | -      | -               | -     | 0.073  | (-0.166, 0.318)  | 0.542   |
|                                            | Obese                       | 0.083  | (-0.032, 0.199)  | 0.148 | -      | -               | -     | 0.143  | (-0.105, 0.387)  | 0.246   |
| BMI continuous                             |                             | 0.011  | (0.002, 0.020)   | 0.017 | -      | -               | -     | 0.015  | (-0.007, 0.036)  | 0.172   |
| Waist circumference                        |                             | 0.004  | (-0.000, 0.007)  | 0.053 | -      | -               | -     | 0.008  | (-0.001, 0.016)  | 0.084   |
| Hip circumference                          |                             | 0.002  | (-0.002, 0.006)  | 0.369 | -      | -               | -     | 0.008  | (-0.001, 0.017)  | 0.098   |
| Body fat %                                 |                             | 0.001  | (-0.003, 0.005)  | 0.619 | -      | -               | -     | 0.012  | (0.001, 0.024)   | 0.028   |
| Marriage (REF: Not in a partnership)       | In a partnership            | 0.111  | (-0.020, 0.243)  | 0.084 | -      | -               | -     | 0.179  | (-0.115, 0.467)  | 0.219   |
| Education (REF: none or less than grade 1) | Grades 1-5                  | 0.101  | (-0.054, 0.257)  | 0.200 | -0.038 | (-0.169, 0.102) | 0.627 | 0.985  | (0.355, 1.611)   | 0.003   |
|                                            | Grades 6-8                  | 0.166  | (0.010, 0.325)   | 0.038 | 0.115  | (-0.214, 0.479) | 0.604 | 0.887  | (0.245, 1.528)   | 0.007   |
|                                            | Grades 9-12                 | 0.199  | (0.026, 0.372)   | 0.024 | -      | -               | -     | 1.008  | (0.371, 1.645)   | 0.003   |
|                                            | Technical school/University | -0.005 | (-0.229, 0.218)  | 0.964 | -      | -               | -     | 0.515  | (-0.273, 1.296)  | 0.153   |
| Time                                       |                             | -      | -                | -     | -      | -               | -     | -0.020 | (-0.024, -0.015) | < 0.001 |

|                                  |            |        |                  |         |       |                |         |         |                  |         |
|----------------------------------|------------|--------|------------------|---------|-------|----------------|---------|---------|------------------|---------|
| Seasonality (REF: Dry season)    | Rainy      | -      | -                | -       | -     | -              | -       | -0.141  | (-0.180, -0.102) | < 0.001 |
|                                  | Post-rainy | -      | -                | -       | -     | -              | -       | -0.020  | (-0.059, 0.019)  | 0.316   |
| Household                        |            |        |                  |         |       |                |         |         |                  |         |
| Average hair Hg of all HH member |            | -0.161 | (-0.206, -0.116) | < 0.001 | 0.093 | (0.061, 0.124) | < 0.001 | 0.117   | (0.064, 0.170)   | < 0.001 |
| Father hair Hg                   |            | -      | -                | -       | 0.073 | (0.042, 0.104) | < 0.001 | -       | -                | -       |
| Mother hair Hg                   |            | -      | -                | -       | 0.056 | (0.037, 0.076) | < 0.001 | -       | -                | -       |
| Average parental hair Hg         |            | -      | -                | -       | 0.055 | (0.035, 0.074) | < 0.001 | -       | -                | -       |
| Spouse hair Hg                   |            | 0.081  | (0.059, 0.104)   | < 0.001 | -     | -              | -       | 0.07457 | (0.039, 0.113)   | < 0.001 |

\* p<0.10; † p<0.05; †† p<0.01; †††p<0.001 compared to the indicated reference level

<sup>1</sup> Log<sub>10</sub>(Hg) Model controls for age, sex, age\*sex, community location, and household member living outside of MDD

<sup>2</sup> Log<sub>10</sub>(Hg) Model controls for sex and community location

<sup>3</sup> Log<sub>10</sub>(Hg) Model controls for marriage and community location

**Table S4.** Association between hair mercury and fish consumption in the population 5 yrs of age and older, WCBA, and children.

|                                                       |                 | Population 5yrs and older <sup>1</sup> |                 |         | Children <sup>2</sup> |                 |         | WCBA <sup>3</sup> |                 |         |
|-------------------------------------------------------|-----------------|----------------------------------------|-----------------|---------|-----------------------|-----------------|---------|-------------------|-----------------|---------|
| Variable                                              | Level           | β                                      | (95% CI)        | P-value | β                     | (95% CI)        | P-value | β                 | (95% CI)        | p-value |
| General fish consumption                              |                 |                                        |                 |         |                       |                 |         |                   |                 |         |
| General consumption frequency (REF: Less than weekly) | Weekly or Daily | -0.017                                 | (-0.195, 0.160) | 0.845   | 0.002                 | (-0.199, 0.201) | 0.987   | 0.078             | (-0.158, 0.313) | 0.507   |

---

|                                                                       |                 |       |                 |       |       |                 |         |       |                 |         |
|-----------------------------------------------------------------------|-----------------|-------|-----------------|-------|-------|-----------------|---------|-------|-----------------|---------|
| General quantity consumed (REF: Low)                                  | Medium          | 0.106 | (-0.077, 0.287) | 0.247 | 0.141 | (-0.091, 0.372) | 0.215   | 0.100 | (-0.152, 0.351) | 0.431   |
|                                                                       | High            | 0.283 | (0.031, 0.534)  | 0.028 | 0.299 | (0.040, 0.553)  | 0.023   | 0.406 | (0.108, 0.702)  | 0.009   |
| Consume trophic level 3 fish (REF: No)                                | Yes             | 0.243 | (0.045, 0.443)  | 0.018 | 0.339 | (0.089, 0.589)  | 0.009   | 0.321 | (0.098, 0.547)  | 0.007   |
| Consumption frequency of trophic level 3 fish (REF: Less than weekly) | Weekly or Daily | 0.206 | (0.046, 0.370)  | 0.013 | 0.265 | (0.086, 0.445)  | 0.004   | 0.286 | (0.087, 0.492)  | 0.006   |
| Specific fish species                                                 |                 |       |                 |       |       |                 |         |       |                 |         |
| Doncella                                                              |                 | 0.253 | (0.086, 0.421)  | 0.004 | 0.320 | (0.135, 0.498)  | < 0.001 | 0.392 | (0.193, 0.593)  | < 0.001 |
| Chambira                                                              |                 | 0.197 | (0.018, 0.380)  | 0.032 | 0.246 | (0.083, 0.438)  | 0.009   | 0.303 | (0.096, 0.517)  | 0.006   |
| Yulilla                                                               |                 | 0.271 | (0.020, 0.523)  | 0.032 | 0.407 | (0.131, 0.701)  | 0.005   | 0.428 | (0.120, 0.732)  | 0.007   |

\* p<0.10; † p<0.05; †† p<0.01; †††p<0.001 compared to the indicated reference level

<sup>1</sup> Log<sub>10</sub>(Hg) Model controls for age, sex, age\*sex, community location, and household member living outside of MDD

<sup>2</sup> Log<sub>10</sub>(Hg) Model controls for sex and community location

<sup>3</sup> Log<sub>10</sub>(Hg) Model controls for marriage and community location

---

## References

1. USEPA, Integrated Risk Information System: Methylmercury (MeHg) (CASRN 22967-92-6). In 2001.
2. USFDA, Title 21 - Food and Drugs - Chapter I Subchapter B - Food for human consumption. In 2016.
